# Supplementary material
Source: ML conference proceedings conference paper supplement (https://openaccess.thecvf.com/content/CVPR2025/html/Cai_Do_Computer_Vision_CVPR_2025_paper.html)
Supplement: Supplementary file 1 [file Cai_Do_Computer_Vision_CVPR_2025_supplemental.zip]

# Supplementary Material for *Do computer vision foundation models learn the low-level characteristics of the human visual system?*

Yancheng Cai, Fei Yin, Dounia Hammou, Rafal Mantiuk; University of Cambridge, UK

yc613@cam.ac.uk, fy277@cam.ac.uk, dh706@cam.ac.uk, mantiuk@gmail.com

This supplementary material provides detailed information on the following: (1) the formulas and examples of the experimental stimuli tested; (2) some further practical implications of our work; and (3) the detailed formula for model alignment scores, along with the model alignment scores for all models across all tests.

Please open [webpage/index.html](http://webpage/index.html) for the complete set of the results.

## 1. Test images

The achromatic Gabor patches used for tests are defined as:

$$G(x, y) = L_b \left( 1 + c \sin \left( 2\pi \frac{\rho x}{\text{ppd}} \right) e^{\left( -\frac{x^2 + y^2}{2 \text{ppd}^2 R^2} \right)} \right), \quad (1)$$

where  $L_b$  denotes the background/mean luminance in  $\text{cd/m}^2$ ,  $c$  represents the contrast,  $R$  is the Gabor radius in visual degree, and  $\rho$  is the spatial frequency in cycles-per-degree (cpd).  $x$  and  $y$  represent the image coordinates, where  $x \in [-\frac{W}{2}, \frac{W}{2}]$  and  $y \in [-\frac{H}{2}, \frac{H}{2}]$ ;  $W = 224$  and  $H = 224$  denote the image width and height, respectively.

To generate chromatic (RG and YV) Gabor stimuli, a single-channel Gabor patch is first created, the color direction is set, then converted to DKL color space, transformed to LMS color space, and finally converted back to RGB to check for gamut constraints. Note that the RGB channel values here are still represented in  $\text{cd/m}^2$  units.

The luminance values,  $G(x, y)$ , were converted to RGB values using the sRGB display model, assuming the peak luminance of  $400 \text{ cd/m}^2$ . The pixels-per-degree (ppd) was set to 60, which approximates the ppd value for a typical human observer viewing an Ultra HD display ( $3840 \times 2160$ ). The resolution of all test and reference images was set to  $224 \times 224$ . Except for Supra-threshold Contrast Matching (Section 1.3), the references for all other eight experiments are uniform achromatic images with a luminance of  $100 \text{ cd/m}^2$ .

### 1.1. Contrast detection

**Spatial Frequency - Achromatic - Gabor** The radius was set to  $1^\circ$ , and the background luminance was  $100 \text{ cd/m}^2$ . Test examples are shown in Figure 1.

### Spatial Frequency - Achromatic - Band-limited Noise

The background luminance was  $100 \text{ cd/m}^2$ . Test examples are shown in Figure 2.

### Spatial Frequency - Chromatic (RG) - Gabor

The radius was set to  $1^\circ$ , and the background luminance was  $100 \text{ cd/m}^2$ . Test examples are shown in Figure 3.

### Spatial Frequency - Chromatic (YV) - Gabor

The radius was set to  $1^\circ$ , and the background luminance was  $100 \text{ cd/m}^2$ . Test examples are shown in Figure 4.

**Luminance** The radius was set to  $1^\circ$ , and the spatial frequency was 2 cpd. Test examples are shown in Figure 5.

**Area** The background luminance was  $100 \text{ cd/m}^2$ , and the spatial frequency was 8 cycles per degree (cpd). Test examples are shown in Figure 6.

## 1.2. Contrast masking

**Phase-Coherent Masking** The test images contained Gabor patches with a spatial frequency of 2 cpd and a radius of  $0.5^\circ$ , while the masks were sinusoidal gratings at the same spatial frequency of 2 cpd. The background luminance was  $32 \text{ cd/m}^2$ , following the parameters established in [1]. Test examples are shown in Figure 7.

**Phase-Incoherent Masking** The test images contained Gabor patches with a spatial frequency of 1.2 cpd and a radius of  $0.8^\circ$ , and the masks contained random noise with a frequency spectrum extending up to 12 cpd. The following equations outline the process of generating the noise mask  $I_{\text{mask}} \in \mathbb{R}^{W \times H}$ :

First, Gaussian noise  $N(x, y)$  is generated:

$$N(x, y) \sim \mathcal{N}(0, 1), \quad x \in [0, W], y \in [0, H]. \quad (2)$$

Next, a two-dimensional Fast Fourier Transform (FFT) is applied to obtain the frequency domain representation  $N_f(u, v)$ :

$$N_f(u, v) = \mathcal{F}\{N(x, y)\}, \quad u \in [0, W], v \in [0, H]. \quad (3)$$

Subsequently, frequency filtering is performed:

$$N_f^{\text{filtered}}(u, v) = \begin{cases} N_f(u, v), & \rho(u, v) \leq 12 \text{ cpd} \\ 0, & \rho(u, v) > 12 \text{ cpd} \end{cases}, \quad (4)$$

$$\rho(u, v) = \sqrt{(K_u)^2 + (K_v)^2}, \quad (5)$$

$$K_u = 2 \rho_{\text{nyquist}} \left( \text{mod} \left( \frac{1}{2} + \frac{u}{W}, 1 \right) - \frac{1}{2} \right), \quad (6)$$

$$K_v = 2 \rho_{\text{nyquist}} \left( \text{mod} \left( \frac{1}{2} + \frac{v}{H}, 1 \right) - \frac{1}{2} \right), \quad (7)$$

where  $\rho_{\text{nyquist}} = \frac{\text{ppd}}{2}$ . The noise in the spatial domain is then obtained using the inverse Fourier transform:

$$N_{\text{bp}}(x, y) = \mathcal{F}^{-1} \{ N_f^{\text{filtered}}(u, v) \}. \quad (8)$$

Finally, the noise mask  $I_{\text{mask}}$  is generated:

$$I_{\text{mask}}(x, y) = L_b \left( 1 + c_{\text{mask}} \frac{N_{\text{bp}}(x, y)}{\sigma_{N_{\text{bp}}}} \right), \quad (9)$$

where  $c_{\text{mask}}$  is the mask contrast,  $\sigma_{N_{\text{bp}}}$  represents the standard deviation of  $N_{\text{bp}}$ . The background luminance  $L_b$  was 37 cd/m<sup>2</sup>, consistent with the conditions in [2]. Test examples are shown in Figure 8.

### 1.3. Supra-threshold contrast matching

We followed the experimental setup from [3], where the reference was a sinusoidal grating with a spatial frequency of 5 cpd and a luminance of 10 cd/m<sup>2</sup>, presented at eight distinct contrast levels  $c_r$ . The test stimulus was also a sinusoidal grating with a luminance of 10 cd/m<sup>2</sup>, but presented at various spatial frequencies  $\rho_t$ . Examples are shown in Figure 9.

## 2. Practical implications

We checked whether our alignment scores (Fig. 6 in the paper) can indicate how well a model can perform on computer vision tasks. In Figure 10, we show scatter plots of the alignment scores and different performance indicators for DINO, DINOv2, and OpenCLIP (data were not available for other models). The correlations (absolute value 0.55–0.8) suggest that good alignment with the contrast masking/matching characteristic can improve model’s performance. Such results were consistent for the alignment of contrast masking and contrast matching, less so for detection (as expected). We did not find a strong correlation between alignment scores and the parameters of the model architecture (model size, number of parameters) or computational GFlops. We hope that future work can provide stronger evidence for the benefits of model-HVS alignment and spark interest in using low-level human vision models to introduce invariances or constraints into the training of the foundation models (via architectural changes, loss functions, or data augmentation).

## 3. Model alignment scores

Section 3.2 in the main text briefly describes the computation of Spearman rank-order correlation coefficients for model alignment scores. This section provides further details and formulas.

Specifically, for each contour plot,  $N$  points were selected along the x-axis  $X_{1 \dots N}$ , where  $X$  represents dimensions such as area, luminance, or mask contrast. Based on the predictions of castleCSF, we obtain the ground truth  $Y_{1 \dots N}$ , where  $Y$  represents sensitivity in contrast detection and test contrast in contrast masking.

We then scaled each  $Y_j (j = 1 \dots N)$  by multipliers  $m_i (i = 1 \dots M)$ :

$$m_i = 10^{\log_{10}(0.5) + \frac{i-1}{M-1} \cdot \log_{10}(\frac{2}{0.5})}, \quad (10)$$

$$Y'_{ij} = m_i Y_j, \quad (11)$$

producing  $Y'_{1 \dots NM}$  and their respective  $S_{1 \dots NM}$  ( $S_{\text{ac}}$ )<sup>1</sup>. Given that psychometric functions near the threshold typically exhibit uniform shapes across all conditions in psychophysical experiments, we hypothesized that the trend of scaled scores would remain consistent across all  $Y_{1 \dots N}$ . The Spearman’s rank correlation coefficient  $r_s$  was calculated as the similarity metric:

$$r_s = \frac{\text{cov}(R(m_{1 \dots NM}), R(S_{1 \dots NM}))}{\sigma_{R(m_{1 \dots NM})} \sigma_{R(S_{1 \dots NM})}}, \quad (12)$$

where  $m_{1 \dots NM} = \bigcup_{k=1}^N m_{1 \dots M}$ ,  $R(*)$  denotes ranked data,  $\text{cov}(*)$  represents covariance, and  $\sigma(*)$  stands for standard deviation. For all models and tests, higher  $r_s$  (closer to 1) reflects a greater model alignment. In the contrast detection experiment,  $N = 20$ ,  $M = 10$ . In the contrast masking experiment,  $M = 10$  and  $N$  is equal to the number of human data points.

In the main text, we presented the experimental results for all models in the form of bar charts. To provide higher decimal precision, the results are presented in Table 1.

## References

- [1] John M Foley. Human luminance pattern-vision mechanisms: masking experiments require a new model. *JOSA A*, 11(6): 1710–1719, 1994. 1
- [2] Karl R Gegenfurtner and Daniel C Kiper. Contrast detection in luminance and chromatic noise. *JOSA A*, 9(11):1880–1888, 1992. 2
- [3] MA Georgeson and GD Sullivan. Contrast constancy: deblurring in human vision by spatial frequency channels. *The Journal of physiology*, 252(3):627–656, 1975. 2, 7

<sup>1</sup>Specifically, for these  $NM$  conditions, a test and reference signal pair is generated for each condition  $(X_j, Y'_{ij})$ , and  $S_{\text{ac}}$  is computed using the method described in the main text.

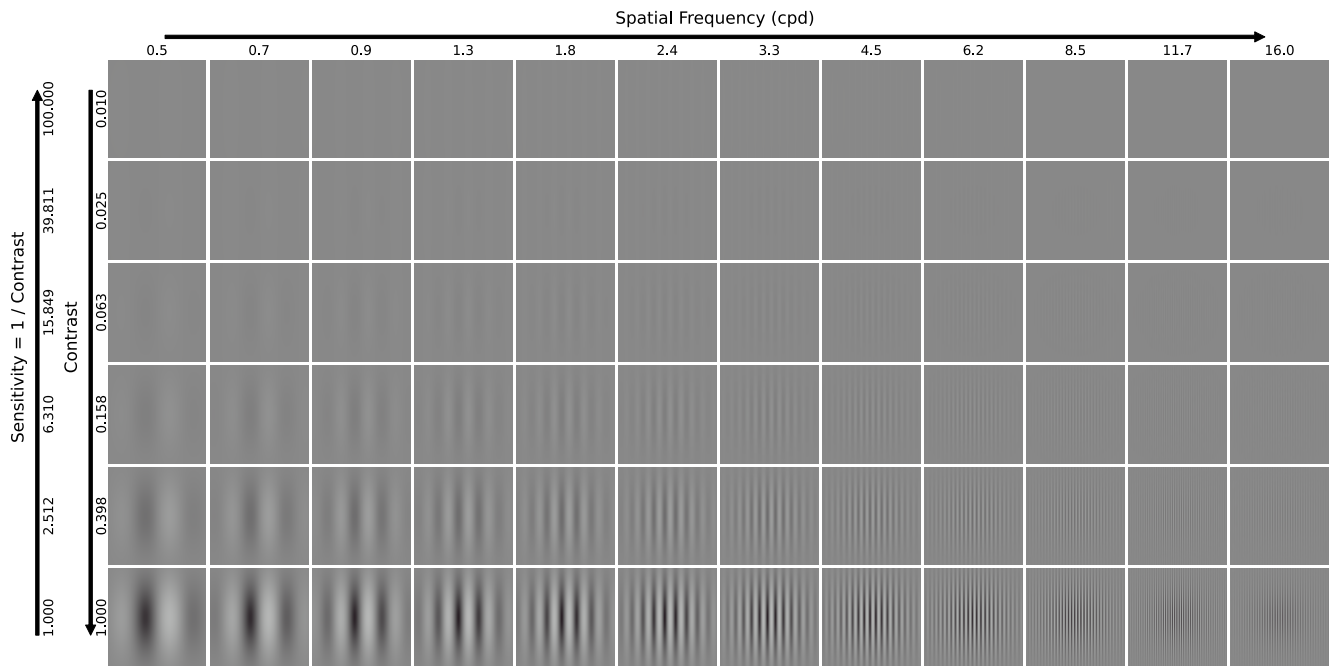

Figure 1. Achromatic Gabors with different spatial frequencies (x-axis) and contrast (y-axis) used as the test images in the contrast detection tests. “cpd” denotes cycles per degree. High-frequency patterns may introduce aliasing artifacts on screens or prints, so we display up to 16 cpd here (no such artifacts were present in our tests). Observations indicate that the human eye is indeed most sensitive to achromatic Gabor patterns with spatial frequencies around 2–4 cpd.

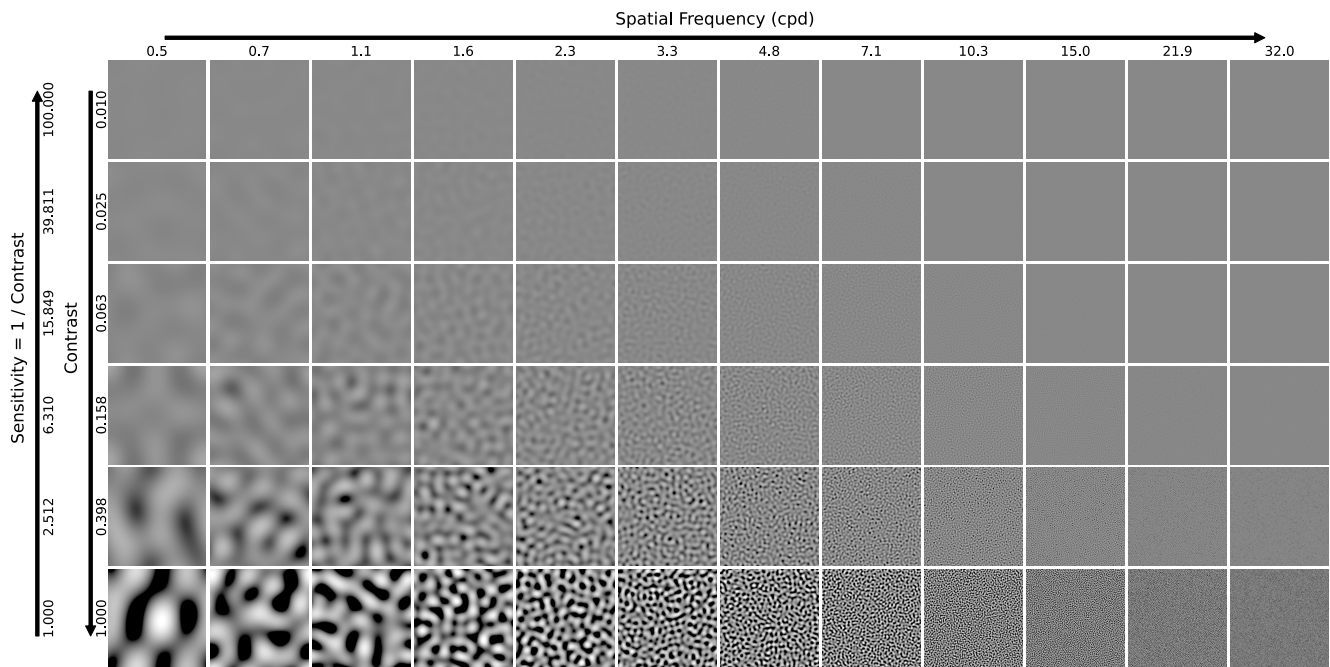

Figure 2. Achromatic band-limited noise signals with different spatial frequencies (x-axis) and contrast (y-axis) used as the test images in the contrast detection tests. Human observers were most sensitive to frequencies in the 2–4 cpd range.

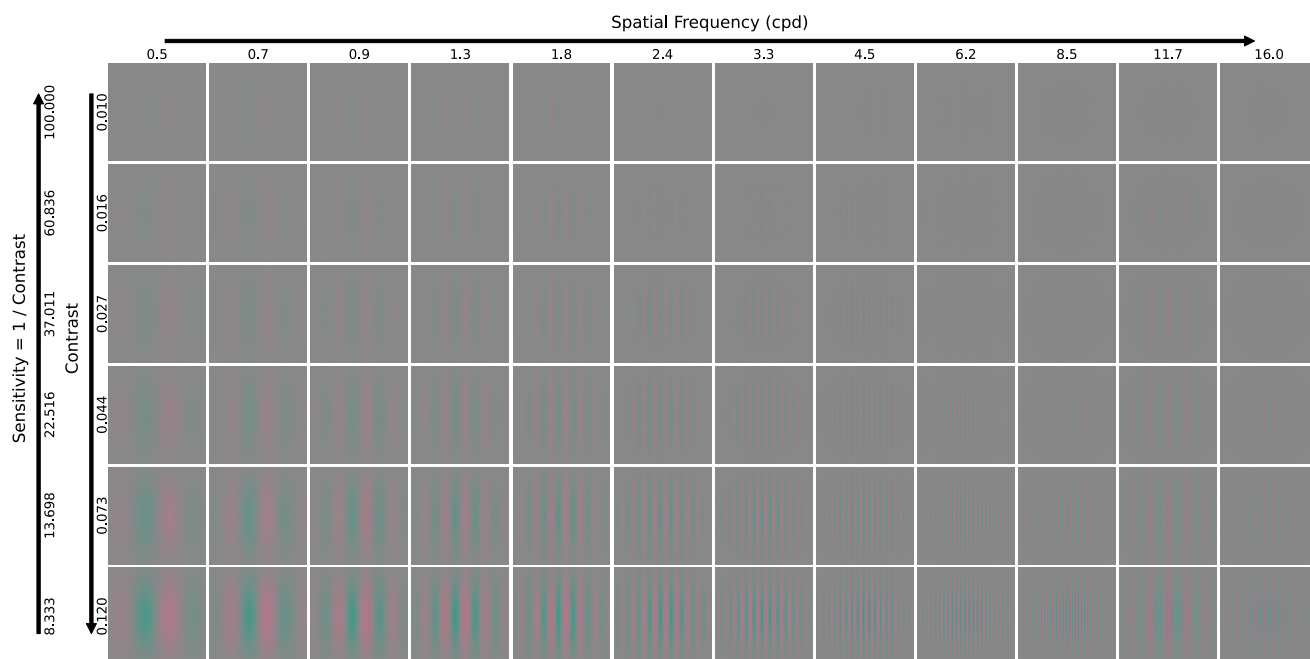

Figure 3. Red-Green (RG) Gabors with different spatial frequencies (x-axis) and contrast (y-axis) used as the test images in the contrast detection tests. Due to gamut limitations, the maximum achievable contrast is capped at 0.2. It was observed that, compared to achromatic Gabor patterns, humans are more sensitive to low frequencies when viewing red-green Gabor patterns.

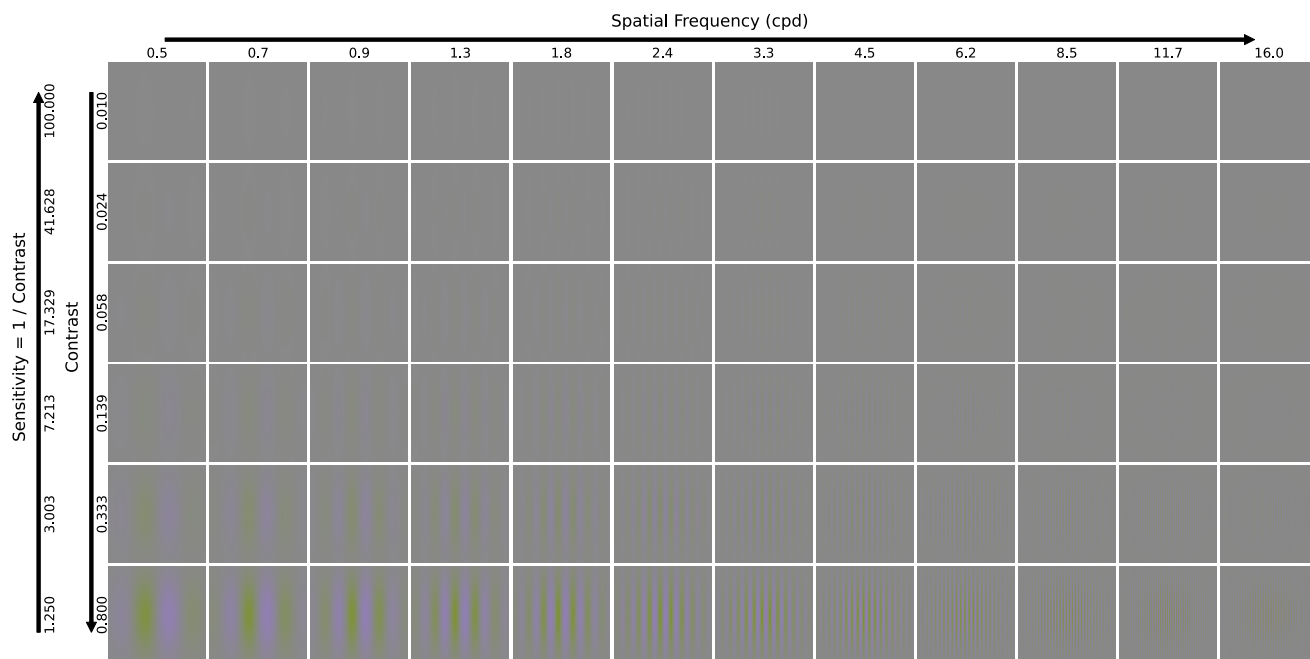

Figure 4. Yellow-Violet (YV) Gabors with different spatial frequencies (x-axis) and contrast (y-axis) used as the test images in the contrast detection tests. Due to gamut limitations, the maximum achievable contrast is capped at 0.2. Similar to RG Gabors, humans are also more sensitive to low-frequency YV Gabors.



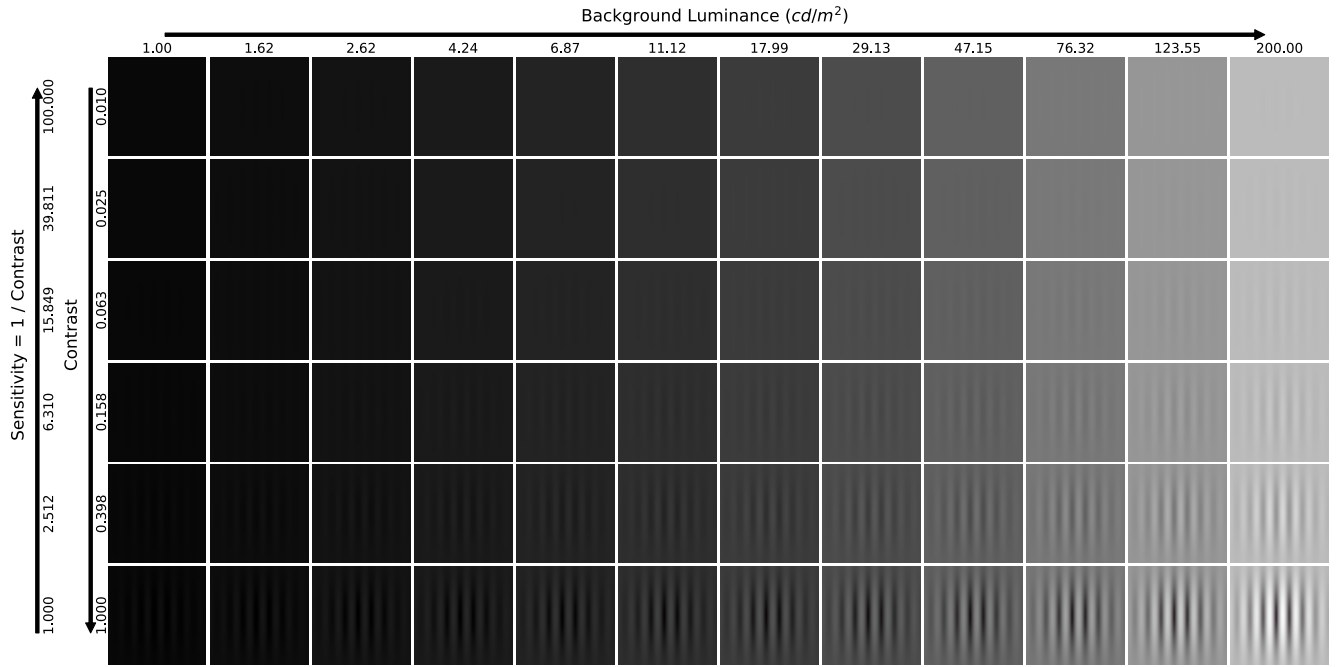

Figure 5. Achromatic Gabor patches with different background luminance (x-axis) and contrasts (y-axis) used as the test images in the contrast detection tests. Note that very low luminance levels cannot be displayed; therefore, a minimum of 1  $\text{cd/m}^2$  is used here. In the experiment, this limitation is not present as we use floating-point inputs.

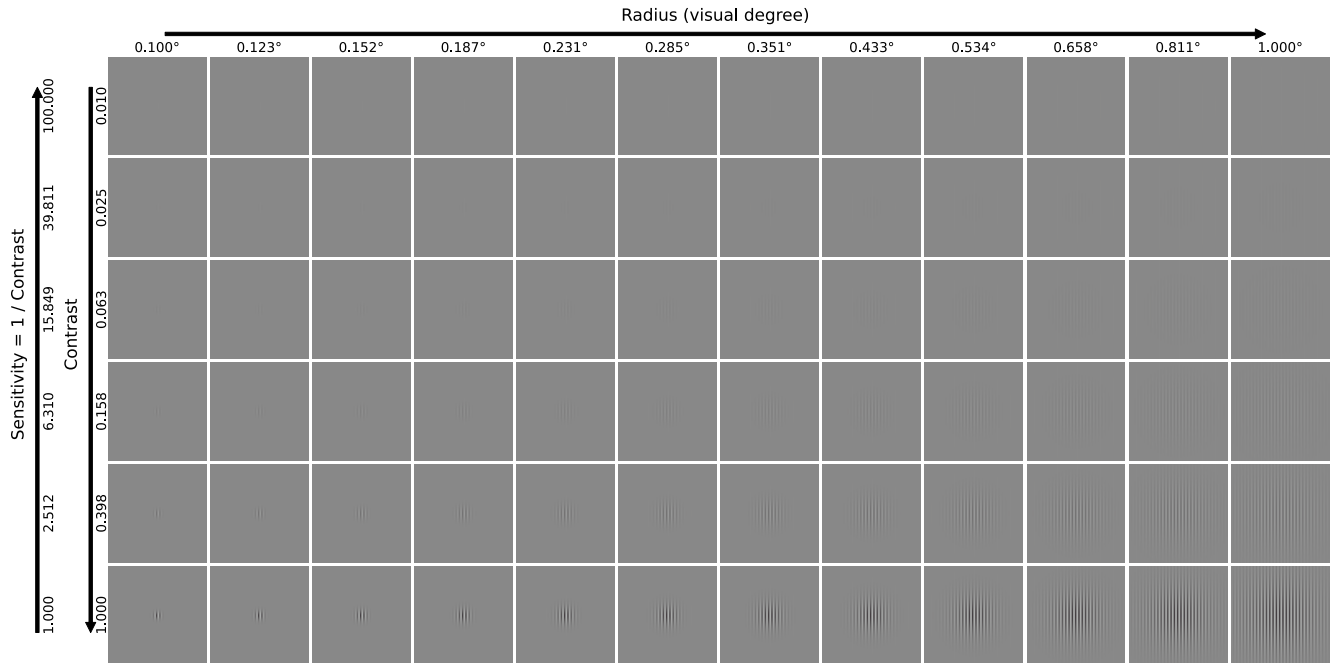

Figure 6. Achromatic Gabor patches with different area (radius) (x-axis) and contrasts (y-axis) used as the test images in the contrast detection tests. In this experiment, we selected a higher spatial frequency (8 cpd); otherwise, it would be impossible to observe a complete Gabor signal within small areas.

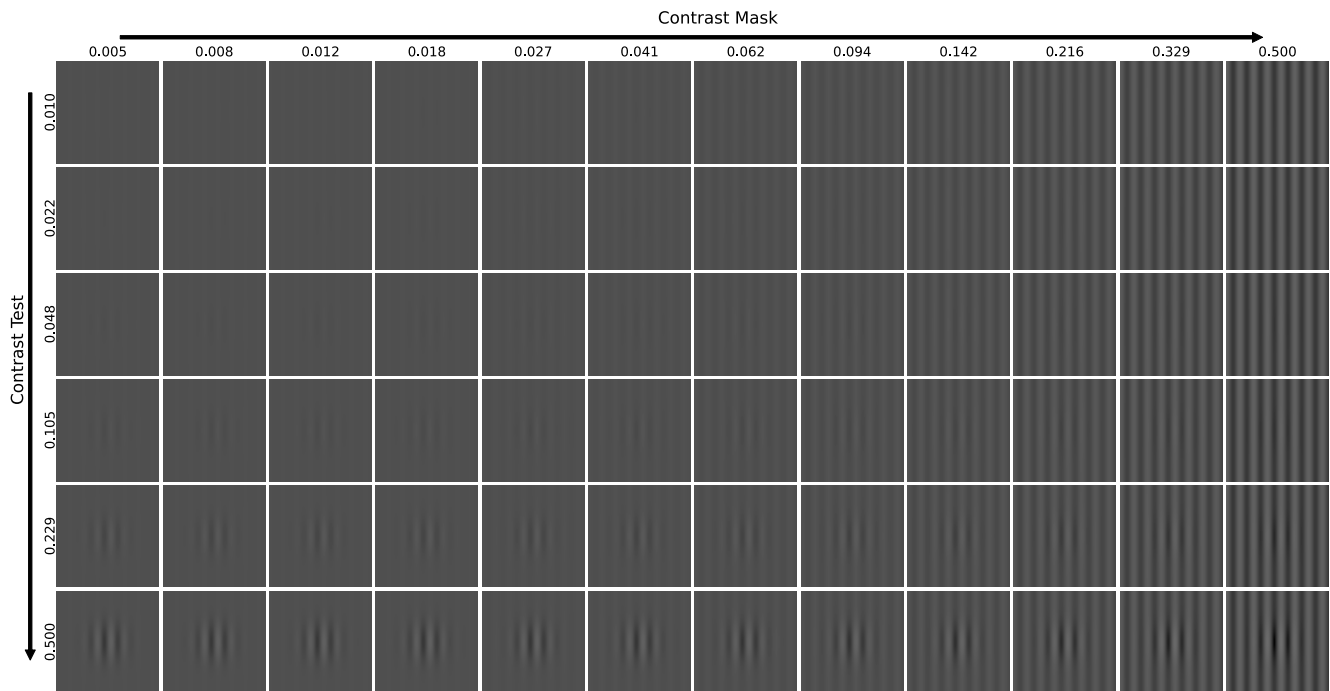

Figure 7. Images from the Phase-Coherent Masking experiment with varying Contrast Mask (x-axis) and Contrast Test (y-axis). The masks are sinusoidal gratings, while the test stimuli are Gabor patterns, set against a background luminance of  $32 \text{ cd/m}^2$ .

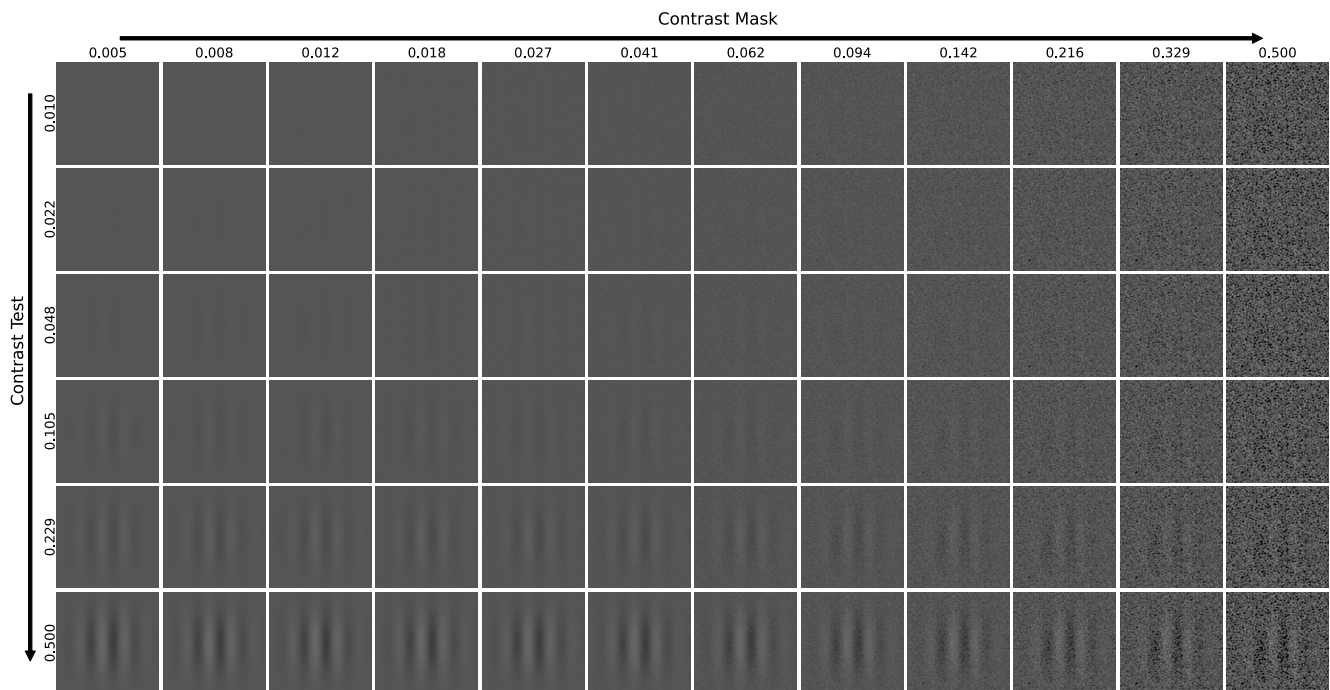

Figure 8. Images from the Phase-Incoherent Masking experiment with varying Contrast Mask (x-axis) and Contrast Test (y-axis). The masks consist of random noise with a frequency spectrum extending up to  $12 \text{ cpd}$ , while the test stimuli are Gabor patches, presented against a background luminance of  $37 \text{ cd/m}^2$ .

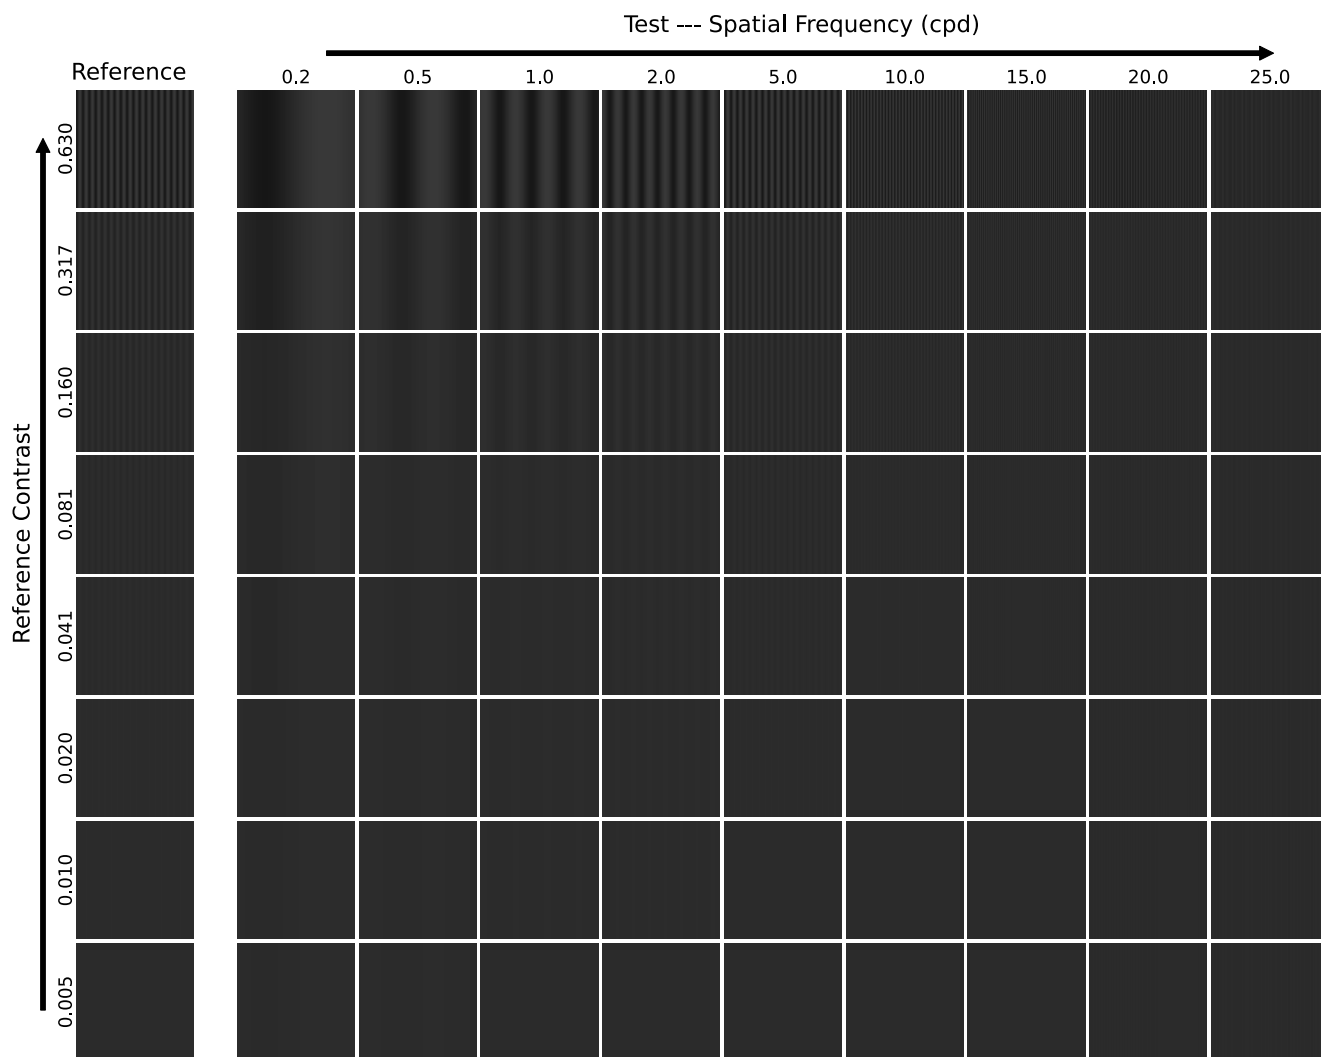

Figure 9. Example images from the Contrast Matching experiment. The first column on the left displays the references, which are sinusoidal gratings at 5 cycles per degree (cpd) with varying reference contrasts. The remaining images on the right are tests with different spatial frequencies matched to the references. Note that the contrast levels of the references, as well as the contrasts and spatial frequencies of the tests, are based on the experimental results in [3]. Following the experimental conditions outlined in [3], the background luminance is set to  $10 \text{ cd/m}^2$ .

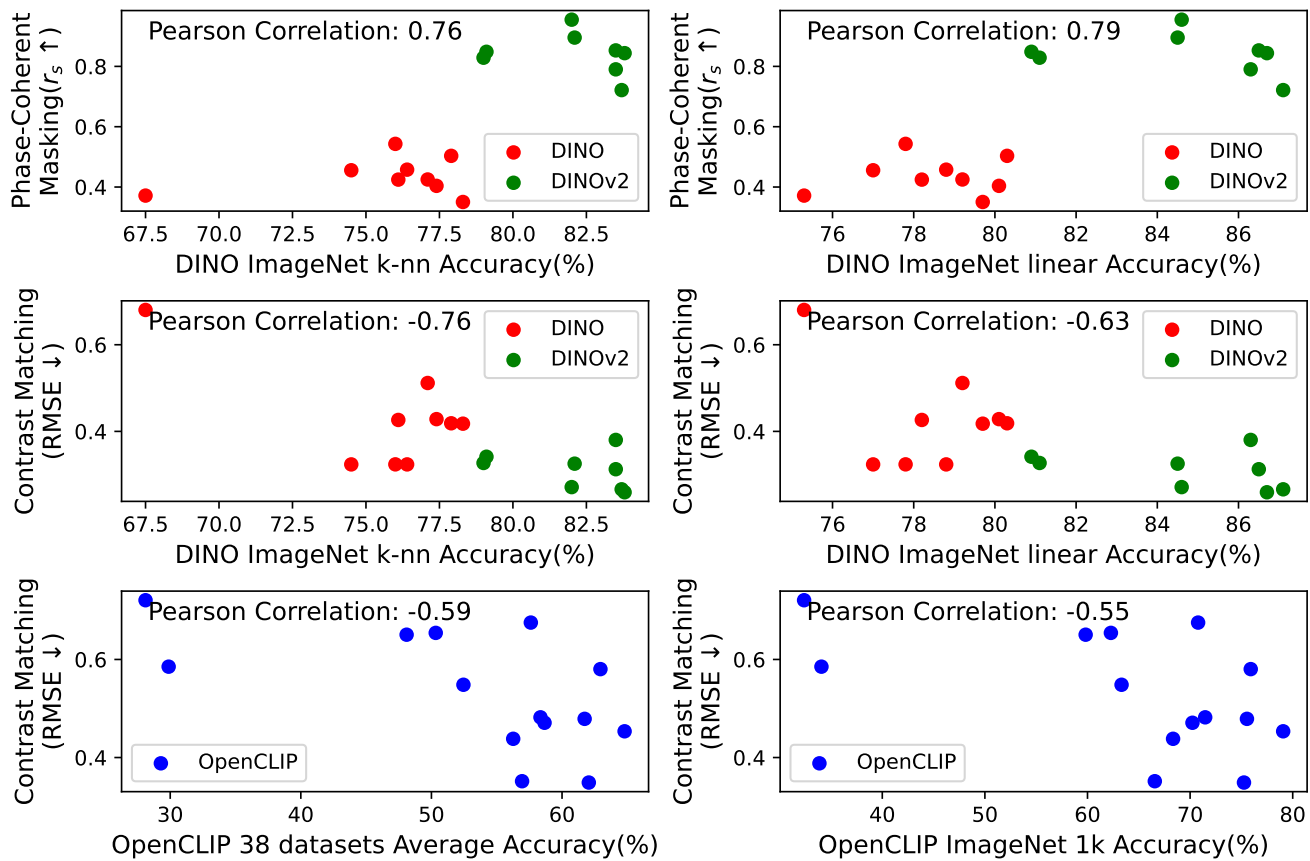

Figure 10. The performance of DINO/DINOv2/OpenCLIP on their classification tasks (from their GitHub repo) shows a potential correlation with the alignment scores in our masking/matching tests.

Table 1. The model alignment scores for all 45 models across nine test types. Spearman’s rank correlation coefficient  $r_s$  is used as the evaluation metric for the contrast detection and contrast masking experiments, with higher values (approaching 1) indicating greater similarity between the model and the human visual system. For the contrast matching experiment, Root Mean Square Error (RMSE) is employed as the metric, where lower values (approaching 0) signify a closer match to the human visual system. For each model series, its best score on each test has been highlighted in bold.

| Models        | Architecture      | Training dataset | Spatial Freq.<br>Gabor Ach.<br>$r_s \uparrow$ | Spatial Freq.<br>Noise Ach.<br>$r_s \uparrow$ | Spatial Freq.<br>Gabor RG<br>$r_s \uparrow$ | Spatial Freq.<br>Gabor YV<br>$r_s \uparrow$ | Luminance<br>Gabor Ach.<br>$r_s \uparrow$ | Area<br>Gabor Ach.<br>$r_s \uparrow$ | Phase<br>Coherent<br>Masking<br>$r_s \uparrow$ | Phase<br>Incoherent<br>Masking<br>$r_s \uparrow$ | Contrast<br>Matching<br>RMSE $\downarrow$ |
|---------------|-------------------|------------------|-----------------------------------------------|-----------------------------------------------|---------------------------------------------|---------------------------------------------|-------------------------------------------|--------------------------------------|------------------------------------------------|--------------------------------------------------|-------------------------------------------|
| No Encoder    | -                 | -                | 0.4688                                        | 0.4594                                        | 0.5235                                      | 0.6582                                      | 0.4188                                    | 0.8981                               | 0.5057                                         | 0.6746                                           | 0.2657                                    |
| DINO          | ResNet-50         | ImageNet         | 0.3428                                        | 0.2506                                        | 0.2795                                      | 0.3359                                      | <b>0.5623</b>                             | 0.9610                               | 0.3716                                         | <b>0.8913</b>                                    | 0.6803                                    |
|               | ViT-S/16          | ImageNet         | 0.4769                                        | <b>0.4951</b>                                 | 0.5316                                      | 0.4517                                      | 0.4260                                    | <b>0.9686</b>                        | 0.4556                                         | 0.8844                                           | <b>0.3238</b>                             |
|               | ViT-S/8           | ImageNet         | 0.4129                                        | 0.4248                                        | 0.4211                                      | 0.4114                                      | 0.4048                                    | 0.9358                               | 0.3504                                         | 0.6262                                           | 0.4178                                    |
|               | ViT-B/16          | ImageNet         | 0.5281                                        | 0.4883                                        | <b>0.6148</b>                               | <b>0.4699</b>                               | 0.4554                                    | 0.9584                               | 0.4246                                         | 0.6351                                           | 0.4264                                    |
|               | ViT-B/8           | ImageNet         | 0.4213                                        | 0.4446                                        | 0.4398                                      | 0.4184                                      | 0.3655                                    | 0.8929                               | 0.4039                                         | 0.4761                                           | 0.4283                                    |
|               | Xcit-S-12/16      | ImageNet         | <b>0.5721</b>                                 | 0.4783                                        | 0.5312                                      | 0.4315                                      | 0.4436                                    | 0.9418                               | <b>0.5431</b>                                  | 0.7120                                           | 0.3239                                    |
|               | Xcit-S-12/8       | ImageNet         | 0.4337                                        | 0.3961                                        | 0.3862                                      | 0.3064                                      | 0.4373                                    | 0.8409                               | 0.4250                                         | 0.7618                                           | 0.5117                                    |
|               | Xcit-M-24/16      | ImageNet         | 0.5424                                        | 0.4848                                        | 0.4651                                      | 0.4330                                      | 0.4916                                    | 0.9408                               | 0.4576                                         | 0.6458                                           | 0.3238                                    |
|               | Xcit-M-24/8       | ImageNet         | 0.4852                                        | 0.3848                                        | 0.3742                                      | 0.4030                                      | 0.5172                                    | 0.8149                               | 0.5034                                         | 0.8028                                           | 0.4187                                    |
| DINOv2        | ViT-S/14          | LVD-142M         | 0.3976                                        | 0.4348                                        | 0.4114                                      | 0.5207                                      | 0.4865                                    | 0.7071                               | 0.8288                                         | 0.9593                                           | 0.3271                                    |
|               | ViT-B/14          | LVD-142M         | 0.4286                                        | 0.5032                                        | 0.4898                                      | 0.7148                                      | 0.5580                                    | 0.9216                               | 0.8955                                         | 0.8514                                           | 0.3255                                    |
|               | ViT-L/14          | LVD-142M         | <b>0.5256</b>                                 | 0.4843                                        | 0.5152                                      | 0.4934                                      | 0.5363                                    | <b>0.9493</b>                        | 0.7902                                         | 0.7968                                           | 0.3803                                    |
|               | ViT-g/14          | LVD-142M         | 0.4304                                        | 0.5198                                        | <b>0.5277</b>                               | 0.6687                                      | 0.4935                                    | 0.7856                               | 0.8530                                         | 0.8846                                           | 0.3127                                    |
|               | ViT-S/14 + reg    | LVD-142M         | 0.4508                                        | 0.4484                                        | 0.4254                                      | 0.4252                                      | 0.5201                                    | 0.6942                               | 0.8484                                         | 0.9254                                           | 0.3415                                    |
|               | ViT-B/14 + reg    | LVD-142M         | 0.4408                                        | 0.5180                                        | 0.4837                                      | 0.6488                                      | <b>0.5705</b>                             | 0.4752                               | <b>0.9549</b>                                  | 0.9539                                           | 0.2714                                    |
|               | ViT-L/14 + reg    | LVD-142M         | 0.4423                                        | 0.5645                                        | 0.4799                                      | <b>0.7996</b>                               | 0.5167                                    | 0.5289                               | 0.8439                                         | <b>0.9814</b>                                    | <b>0.2595</b>                             |
|               | ViT-g/14 + reg    | LVD-142M         | 0.4351                                        | <b>0.5732</b>                                 | 0.4518                                      | 0.6670                                      | 0.5168                                    | 0.5600                               | 0.7214                                         | 0.9295                                           | 0.2663                                    |
| OpenCLIP      | ResNet-50         | OpenAI           | 0.3499                                        | 0.2903                                        | 0.2972                                      | 0.3310                                      | <b>0.5703</b>                             | 0.6855                               | 0.4981                                         | 0.7349                                           | 0.6505                                    |
|               | ResNet-50         | YFCC-15M         | 0.3604                                        | 0.2562                                        | 0.3206                                      | 0.2729                                      | 0.5629                                    | <b>0.9671</b>                        | 0.4506                                         | 0.6802                                           | 0.7208                                    |
|               | ResNet-101        | OpenAI           | 0.4130                                        | 0.3001                                        | 0.3403                                      | 0.3530                                      | 0.5070                                    | 0.9568                               | 0.4031                                         | 0.5697                                           | 0.6542                                    |
|               | ResNet-101        | YFCC-15M         | 0.3414                                        | 0.2275                                        | 0.3620                                      | 0.3479                                      | 0.4569                                    | 0.9046                               | 0.5136                                         | 0.8588                                           | 0.5853                                    |
|               | ConvNext-B-w      | LAION-2B         | 0.3957                                        | 0.2787                                        | 0.3772                                      | 0.4233                                      | 0.4802                                    | 0.9590                               | 0.3461                                         | 0.6583                                           | 0.6752                                    |
|               | ConvNext-B-w      | LAION-2B+        | 0.4649                                        | 0.3487                                        | 0.4458                                      | 0.5648                                      | 0.3854                                    | 0.7026                               | 0.4887                                         | 0.5971                                           | 0.4820                                    |
|               | ConvNext-L-d      | LAION-2B+        | 0.3419                                        | 0.2835                                        | 0.3911                                      | 0.6443                                      | 0.1530                                    | 0.7690                               | 0.4919                                         | 0.4983                                           | 0.5803                                    |
|               | ConvNext-XXL      | LAION-2B+        | 0.4136                                        | 0.3642                                        | 0.3890                                      | 0.6212                                      | 0.1112                                    | 0.8422                               | 0.4699                                         | 0.4586                                           | 0.4535                                    |
|               | ViT-B/32          | OpenAI           | 0.4132                                        | 0.5696                                        | 0.3748                                      | 0.7197                                      | 0.1772                                    | 0.9434                               | 0.4047                                         | 0.7736                                           | 0.5484                                    |
|               | ViT-B/32          | LAION-2B         | 0.5108                                        | <b>0.6556</b>                                 | 0.3146                                      | 0.4108                                      | 0.3063                                    | 0.8673                               | <b>0.8837</b>                                  | <b>0.9620</b>                                    | 0.3517                                    |
|               | ViT-B/16          | OpenAI           | 0.4798                                        | 0.5429                                        | 0.4138                                      | 0.7141                                      | 0.2655                                    | 0.7887                               | 0.4321                                         | 0.6451                                           | 0.4382                                    |
|               | ViT-B/16          | LAION-2B         | 0.4654                                        | 0.5740                                        | 0.4144                                      | 0.6922                                      | 0.4242                                    | 0.7869                               | 0.5235                                         | 0.7725                                           | 0.4709                                    |
|               | ViT-L/14          | OpenAI           | 0.4625                                        | 0.5026                                        | 0.4357                                      | 0.6229                                      | 0.4585                                    | 0.8892                               | 0.5496                                         | 0.7050                                           | 0.4789                                    |
|               | ViT-L/14          | LAION-2B         | <b>0.5917</b>                                 | 0.5240                                        | <b>0.4801</b>                               | <b>0.7338</b>                               | 0.3084                                    | 0.6430                               | 0.7678                                         | 0.8799                                           | <b>0.3490</b>                             |
| SAM           | ViT-B-SAM         | SA-1B            | 0.3545                                        | <b>0.3287</b>                                 | <b>0.3577</b>                               | 0.3617                                      | 0.3074                                    | <b>0.9714</b>                        | <b>0.4144</b>                                  | 0.4353                                           | 0.5877                                    |
|               | ViT-L-SAM         | SA-1B            | 0.3061                                        | 0.2769                                        | 0.3160                                      | 0.3140                                      | 0.3090                                    | 0.9598                               | 0.4077                                         | 0.3787                                           | 0.6354                                    |
|               | ViT-H-SAM         | SA-1B            | <b>0.3651</b>                                 | 0.3234                                        | 0.3316                                      | <b>0.3863</b>                               | <b>0.5243</b>                             | 0.9533                               | 0.3983                                         | <b>0.5105</b>                                    | <b>0.5489</b>                             |
| SAM-2         | SAM2.1-hiera-tiny | SA-V             | 0.4058                                        | 0.3483                                        | 0.4315                                      | 0.4693                                      | 0.4966                                    | <b>0.9660</b>                        | 0.4137                                         | 0.4646                                           | 0.4805                                    |
|               | SAM2.1-hiera-S    | SA-V             | <b>0.4544</b>                                 | <b>0.3705</b>                                 | 0.3936                                      | 0.4608                                      | 0.5389                                    | 0.9533                               | 0.398                                          | 0.4941                                           | <b>0.4472</b>                             |
|               | SAM2.1-hiera-B+   | SA-V             | 0.3728                                        | 0.3195                                        | <b>0.4949</b>                               | 0.4993                                      | 0.5396                                    | 0.9296                               | 0.4062                                         | 0.4882                                           | 0.4852                                    |
|               | SAM2.1-hiera-L    | SA-V             | 0.3872                                        | 0.3259                                        | 0.3695                                      | <b>0.4935</b>                               | <b>0.5631</b>                             | 0.9431                               | <b>0.4613</b>                                  | <b>0.7361</b>                                    | 0.4686                                    |
| MAE           | ViT-B-MAE         | ImageNet         | <b>0.4471</b>                                 | <b>0.4903</b>                                 | <b>0.4410</b>                               | <b>0.5008</b>                               | 0.5812                                    | <b>0.9036</b>                        | 0.5446                                         | <b>0.7277</b>                                    | <b>0.4223</b>                             |
|               | ViT-L-MAE         | ImageNet         | 0.4284                                        | 0.4560                                        | 0.4126                                      | 0.4803                                      | 0.5647                                    | 0.8874                               | <b>0.6849</b>                                  | 0.7043                                           | 0.4344                                    |
|               | ViT-H-MAE         | ImageNet         | 0.4250                                        | 0.3969                                        | 0.3995                                      | 0.4737                                      | <b>0.6335</b>                             | 0.6466                               | 0.5003                                         | 0.6088                                           | 0.4964                                    |
| SD-VAE        | SD-v1-5           | LAION-5B         | <b>0.3527</b>                                 | <b>0.4226</b>                                 | <b>0.8447</b>                               | <b>0.8051</b>                               | <b>0.4993</b>                             | <b>0.8402</b>                        | <b>0.5394</b>                                  | <b>0.5579</b>                                    | <b>0.4177</b>                             |
|               | SD-xl-base-1.0    | LAION-5B         | 0.2465                                        | 0.1662                                        | 0.3811                                      | 0.3132                                      | 0.4273                                    | 0.3561                               | 0.4996                                         | 0.4962                                           | 0.6727                                    |
| ColorVideoVDP | HVS-based         | XR-DAVID+        | 0.5545                                        | 0.7817                                        | 0.7455                                      | 0.9339                                      | 0.9020                                    | 0.8937                               | 0.7418                                         | 0.7626                                           | 0.2604                                    |
